# Supplementary material for: Tolerance factor, phase stability and order–disorder of the pyrochlore structure
Source: Royal Society of Chemistry journal article supplement (doi:10.1039/d0qi00016g), 2020-01-01
Supplement: d0qi00016g1.pdf [file d0qi00016g1.pdf]

## Supplementary Information

Tolerance Factor, Phase Stability and Order-Disorder of the

Pyrochlore Structure

Zhen Song and Quanlin Liu\*

*Beijing Key Laboratory for New Energy Materials and Technologies, School of Materials Science and Engineering, University of Science and Technology Beijing, Beijing 100083, China.*

E-mail: [qlliu@ustb.edu.cn](mailto:qlliu@ustb.edu.cn)

Figure S1, Page 2

Figure S2, Page 2

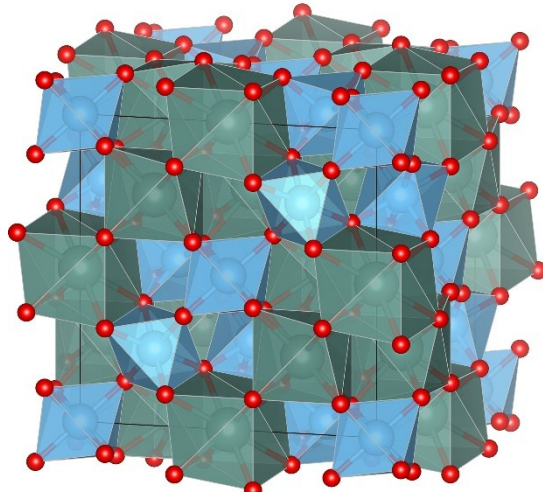

Figure S1 General view of the pyrochlore structure.

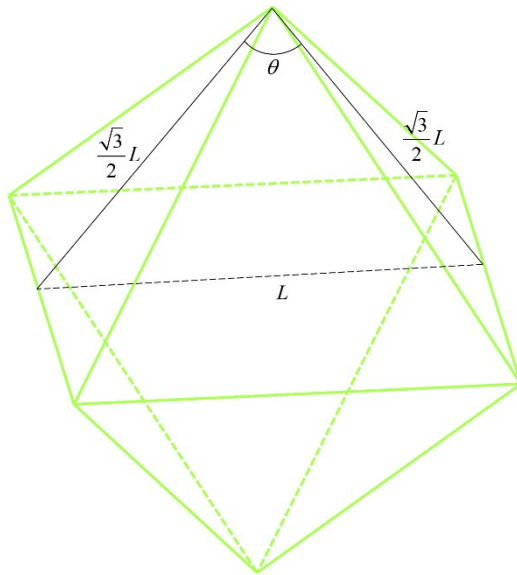

$$\cos \theta = \frac{\left(\frac{\sqrt{3}}{2}L\right)^2 + \left(\frac{\sqrt{3}}{2}L\right)^2 - L^2}{2 \times \frac{\sqrt{3}}{2}L \times \frac{\sqrt{3}}{2}L} = \frac{1}{3}$$

Figure S2 Derivation of angles  $M_1M_0M_2$ ,  $M_2M_0M_3$  and  $M_3M_0M_4$  in Fig. 1 (c)
